# Supplementary material
Source: publisher figshare collection journal article supplement (https://springernature.figshare.com/ndownloader/files/23544962)
Supplement: Supplementary file 1 [file 23544962]

**Annex 1.** Pearson correlation coefficient of AMF associations with soil properties along invasion rate.

|  | IR | SA | HC | MHC | AC | VC | OC | .K | Ca | P | TN | BD | MC | clay | silt | sand |
| --- | --- | --- | --- | --- | --- | --- | --- | --- | --- | --- | --- | --- | --- | --- | --- | --- |
| IR | 1.00 | -0.86*** | -0.57** | -0.35ns | -0.33 ns | -0.29 ns | -0.75** | -0.17 ns | -0.52* | -0.46* | -0.11 ns | 0.75** | -0.88*** | -0.08 ns | -0.74** | 0.72** |
| SA |  | 1.00 | 0.48* | 0.27 ns | 0.31 ns | 0.30 ns | 0.65** | 0.24 ns | 0.40 ns | 0.47* | -0.02 ns | -0.74** | 0.90*** | 0.13 ns | 0.61** | -0.63** |
| HC |  |  | 1.00 | 0.72** | 0.25 ns | 0.14 ns | 0.36 ns | 0.24 ns | -0.18 ns | 0.25 ns | 0.41* | -0.43* | 0.43* | -0.41* | 0.48* | -0.19 ns |
| MHC |  |  |  | 1.00 | 0.16 ns | 0.16 ns | 0.26 ns | 0.45* | -0.23 ns | 0.22 ns | 0.44* | -0.08 ns | 0.18 ns | -0.33 ns | 0.25 | -0.03 ns |
| AC |  |  |  |  | 1.00 | 0.21 ns | 0.48* | 0.18 ns | 0.49* | 0.43* | 0.16 ns | -0.49* | 0.63** | 0.14 ns | 0.44* | -0.48* |
| VC |  |  |  |  |  | 1.00 | 0.43* | -0.01 ns | 0.34 ns | 0.34 ns | 0.29 ns | -0.40 ns | 0.42* | -0.01 ns | 0.38 ns | -0.34 ns |
| OC |  |  |  |  |  |  | 1.00 | 0.33 | 0.48 | 0.68 | 0.08 | -0.84 | 0.79 | 0.28 | 0.78 | -0.88 |
| Ex.K |  |  |  |  |  |  |  | 1.00 | -0.20 | 0.50 | 0.02 | -0.19 | 0.32 | 0.11 | 0.12 | -0.18 |
| Ex.Ca |  |  |  |  |  |  |  |  | 1.00 | -0.03 | -0.09 | -0.29 | 0.40 | 0.36 | 0.50 | -0.67 |
| Av.P |  |  |  |  |  |  |  |  |  | 1.00 | 0.05 | -0.71 | 0.56 | 0.33 | 0.32 | -0.49 |
| TN |  |  |  |  |  |  |  |  |  |  | 1.00 | -0.20 | 0.15 | -0.53 | 0.28 | 0.06 |
| BD |  |  |  |  |  |  |  |  |  |  |  | 1.00 | -0.86 | -0.11 | -0.77 | 0.77 |
| MC |  |  |  |  |  |  |  |  |  |  |  |  | 1.00 | 0.16 | 0.74 | -0.77 |
| clay |  |  |  |  |  |  |  |  |  |  |  |  |  | 1.00 | -0.17 | -0.44 |
| silt |  |  |  |  |  |  |  |  |  |  |  |  |  |  | 1.00 | -0.81 |
| sand |  |  |  |  |  |  |  |  |  |  |  |  |  |  |  | 1.00 |

*p < 0.05; **p < 0.01 and ***p < 0.001. and ns: no significa

IR: invasion rate, SA: spore abundance, HC: hyphal colonization, MHC: mycorrhizal colonization, AC: arbuscular colonization, VC: vesicular colonization, P: Available Phosphorus, TN: Total Nitrogen, OC: Organic carbon, K: exchangeable Potassium, Ca: exchangeable Calcium, BD: bulk density, MC: moisture content
